# Supplementary material
Source: PubMed Central journal article supplement (PMC1183411)
Supplement: plntphys_pp.105.062539_1.pdf [file plntphys_pp.105.062539_1.pdf]

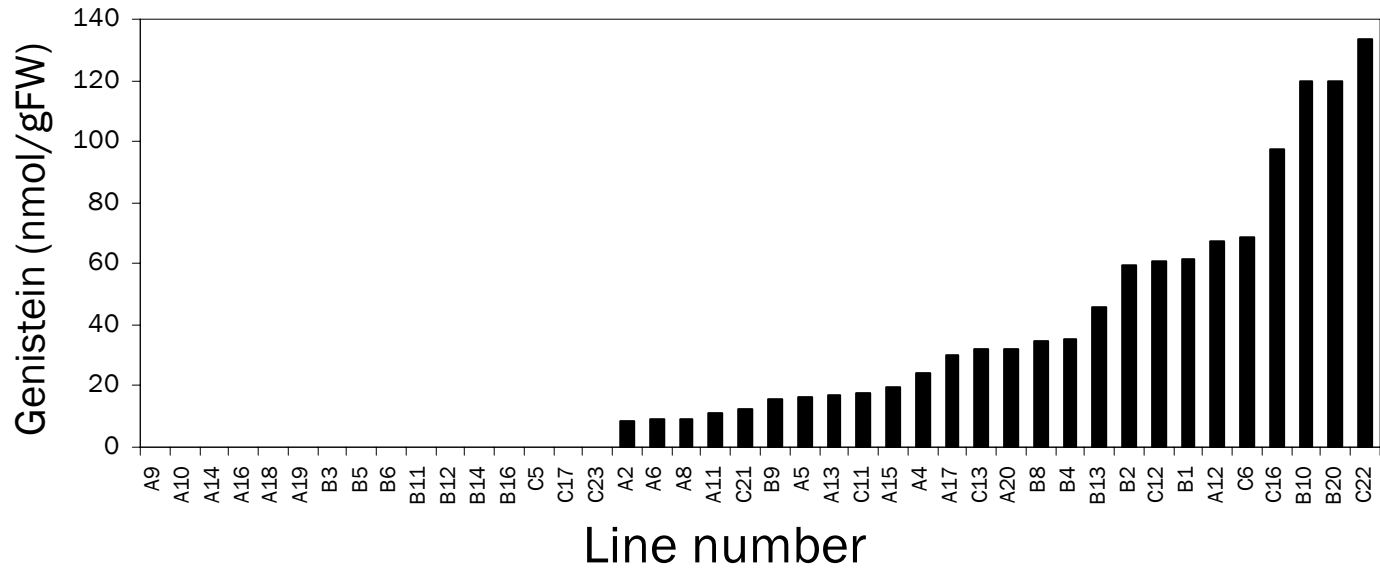

**Supplemental Figure 1.** Quantitation of genistein levels in leaf extracts of 42 independent *Mt/FS1*-expressing lines.
