# Supplementary material
Source: PubMed Central journal article supplement (PMC1183411)
Supplement: plntphys_pp.105.062539_2.pdf [file plntphys_pp.105.062539_2.pdf]

Supplemental Table 1. Genes with statistically significant changes in gene expression identified from microarray analyses of Mt*IFS1*-expressing line B20 and vector control line VC11

| TIGR Identifier            | Number of ESTs <sup>1</sup> | Fold-change (B20/VC11) | p-value | Gene annotation of closest BLAST homolog                     |
|----------------------------|-----------------------------|------------------------|---------|--------------------------------------------------------------|
| <b>TC45135<sup>2</sup></b> | 4                           | 5.35                   | 0.0045  | <b>Isoflavone synthase</b>                                   |
| <b>TC45136<sup>2</sup></b> | 36                          | 4.00                   | 0.0000  | <b>Isoflavone synthase</b>                                   |
| TC55222                    | 4                           | 3.47                   | 0.0300  | unknown protein ( <i>A. thaliana</i> )                       |
| TC44434                    | 15                          | 2.67                   | 0.0043  | DNA-binding protein 3<br>( <i>Nicotiana tabacum</i> )        |
| TC46175 <sup>1</sup>       | 6                           | 2.67                   | 0.0000  | 3' UTR of ubiquitin/ribosomal extension protein              |
| TC55546                    | 4                           | 2.49                   | 0.0045  | acetoacetyl-CoA thiolase ( <i>A. thaliana</i> )              |
| TC55319                    | 4                           | 2.13                   | 0.0158  | unknown protein ( <i>A. thaliana</i> )                       |
| TC52492                    | 18                          | 2.10                   | 0.0045  | GmMYB29A2 gene ( <i>Glycine max</i> )                        |
| TC55406                    | 6                           | 2.07                   | 0.0158  | putative ankyrin repeat protein<br>EMB506 <i>Glycine max</i> |
| TC46537                    | 5                           | 2.02                   | 0.0043  | eceriferum3 (CER3) <i>Glycine max</i>                        |
| TC45848                    | 11                          | -2.30                  | 0.0010  | hypothetical protein ( <i>Oryza</i>                          |

|         |   |       |        |                                                                                        |
|---------|---|-------|--------|----------------------------------------------------------------------------------------|
|         |   |       |        | <i>sativa</i> )                                                                        |
| TC58945 | 2 | -2.30 | 0.0045 | putative glutathione S-<br>transferase T3 ( <i>Lycopersicon<br/>esculentum</i> )       |
| TC49931 | 2 | -2.57 | 0.0214 | transducin family protein / WD-<br>40 repeat family protein ( <i>A.<br/>thaliana</i> ) |

---

<sup>1</sup>Number of ESTs in TIGR *Medicago* Gene Index Release 7.0 (May 2003).

<sup>2</sup>TCs identified as upregulated in both Mt*IFS1*-expressing lines relative to vector control line VC11.
