# Supplementary material
Source: PubMed Central journal article supplement (PMC1183411)
Supplement: plntphys_pp.105.062539_3.pdf [file plntphys_pp.105.062539_3.pdf]

Supplemental Table 2. Genes with statistically significant changes in gene expression identified from microarray analyses of Mt*IFS1*-expressing lines C22 and B20

| TIGR Identifier | Number of ESTs <sup>1</sup> | Fold-change (C22/B20) | p-value | Gene annotation of closest BLAST homolog                      |
|-----------------|-----------------------------|-----------------------|---------|---------------------------------------------------------------|
| TC56412         | 3                           | 4.41                  | 0.0001  | putative ABA-induced guard cell protein ( <i>Vicia faba</i> ) |
| TC52082         | 5                           | 2.44                  | 0.0222  | bZIP transcription factor ( <i>A. thaliana</i> )              |
| TC58318         | 2                           | 2.30                  | 0.0222  | ribitol kinase, putative ( <i>A. thaliana</i> )               |
| TC50366         | 2                           | -2.08                 | 0.0002  | At4g08980 ( <i>A. thaliana</i> )                              |
| TC52786         | 13                          | -2.13                 | 0.0266  | At1g03840 ( <i>A. thaliana</i> )                              |
| TC56338         | 3                           | -2.14                 | 0.0062  | AG-motif binding protein-5 ( <i>Nicotiana tabacum</i> )       |
| TC47341         | 4                           | -2.20                 | 0.0255  | expressed protein ( <i>A. thaliana</i> )                      |
| TC51438         | 70                          | -2.43                 | 0.0234  | 6-phosphogluconate dehydrogenase                              |
| TC50867         | 4                           | -2.65                 | 0.0000  | putative thaumatin protein ( <i>A. thaliana</i> )             |
| TC50822         | 2                           | -2.76                 | 0.0496  | protein kinase MK6 ( <i>Mesembryanthemum crystallinum</i> )   |

|         |    |       |        |                                                 |
|---------|----|-------|--------|-------------------------------------------------|
| TC44464 | 27 | -2.82 | 0.0050 | hypothetical protein ( <i>L. corniculatus</i> ) |
|---------|----|-------|--------|-------------------------------------------------|

|         |   |       |        |                    |
|---------|---|-------|--------|--------------------|
| TC49689 | 2 | -3.27 | 0.0000 | No significant hit |
|---------|---|-------|--------|--------------------|

<sup>1</sup>Number of ESTs in TIGR *Medicago* Gene Index Release 7.0 (May 2003).
